# Supplementary material
Source: PubMed Central journal article supplement (PMC3626169)
Supplement: NIHMS441938-supplement-SUPPL2.pdf [file NIHMS441938-supplement-SUPPL2.pdf]

**Supplemental information SI2.** Unadjusted and multivariate Cox proportional hazard models for biochemical relapse by GST genotypes.

| Genotypes                                                       | HR (95% CI)             | HR <sub>adj</sub> <sup>a</sup> (95% CI) | HR <sub>adj</sub> <sup>b</sup> (95% CI) | HR <sub>adj</sub> <sup>c</sup> (95% CI) | HR <sub>adj</sub> <sup>d</sup> (95% CI) | HR <sub>adj</sub> <sup>e</sup> (95% CI) | HR <sub>adj</sub> <sup>f</sup> (95% CI) |
|-----------------------------------------------------------------|-------------------------|-----------------------------------------|-----------------------------------------|-----------------------------------------|-----------------------------------------|-----------------------------------------|-----------------------------------------|
| <b>GSTT1</b>                                                    |                         |                                         |                                         |                                         |                                         |                                         |                                         |
| Present                                                         | 1.00 (reference)        |                                         | 1.00 (reference)                        | 1.00 (reference)                        | 1.00 (reference)                        | 1.00 (reference)                        |                                         |
| Null                                                            | 1.69 (0.81-3.53)        |                                         | 1.87 (0.89-3.91)                        | 1.88 (0.88-4.01)                        | 2.05 (0.92-4.54)                        | 1.86 (0.85-4.09)                        |                                         |
| p-value                                                         | 0.164                   | NA                                      | 0.099                                   | 0.103                                   | 0.078                                   | 0.121                                   | NA                                      |
| <b>GSTM1</b>                                                    |                         |                                         |                                         |                                         |                                         |                                         |                                         |
| Present                                                         | 1.00 (reference)        |                                         | 1.00 (reference)                        | 1.00 (reference)                        | 1.00 (reference)                        | 1.00 (reference)                        |                                         |
| Null                                                            | 1.26 (0.64-2.47)        |                                         | 1.26 (0.64-2.48)                        | 1.08 (0.54-2.18)                        | 0.97 (0.47-2.01)                        | 1.14 (0.57-2.28)                        |                                         |
| p-value                                                         | 0.503                   | NA                                      | 0.496                                   | 0.823                                   | 0.937                                   | 0.703                                   | NA                                      |
| <b>GSTP1 c.313 A&gt;G</b>                                       |                         |                                         |                                         |                                         |                                         |                                         |                                         |
| AA                                                              | 1.00 (reference)        | 1.00 (reference)                        | 1.00 (reference)                        | 1.00 (reference)                        | 1.00 (reference)                        | 1.00 (reference)                        | 1.00 (reference)                        |
| AG                                                              | 1.16 (0.54-2.52)        | 1.13 (0.52-2.47)                        | 1.20 (0.55-2.60)                        | 1.12 (0.49-2.56)                        | 0.85 (0.33-2.17)                        | 0.93 (0.39-2.17)                        | 1.00 (0.42-2.40)                        |
| p-value (AG vs AA)                                              | 0.702                   | 0.756                                   | 0.649                                   | 0.793                                   | 0.729                                   | 0.847                                   | 0.996                                   |
| GG                                                              | <b>3.38 (1.40-8.16)</b> | <b>3.01 (1.27-7.55)</b>                 | <b>2.96 (1.19-7.33)</b>                 | 2.63 (0.96-7.16)                        | 2.73 (0.89-8.38)                        | 2.55 (0.88-7.36)                        | 2.49 (0.88-7.03)                        |
| p-value (GG vs AA)                                              | <b>0.007</b>            | <b>0.013</b>                            | <b>0.019</b>                            | 0.059                                   | 0.079                                   | 0.084                                   | 0.085                                   |
| <b>GSTP1 c.313 A&gt;G</b>                                       |                         |                                         |                                         |                                         |                                         |                                         |                                         |
| AA+AG                                                           | 1.00 (reference)        | 1.00 (reference)                        | 1.00 (reference)                        | 1.00 (reference)                        | 1.00 (reference)                        | 1.00 (reference)                        | 1.00 (reference)                        |
| GG                                                              | <b>3.16 (1.41-7.06)</b> | <b>2.92 (1.31-6.57)</b>                 | <b>2.73 (1.19-6.28)</b>                 | <b>2.48 (1.00-6.13)</b>                 | <b>3.01 (1.13-8.02)</b>                 | <b>2.68 (1.07-6.75)</b>                 | <b>2.49 (1.00-6.23)</b>                 |
| p-value                                                         | <b>0.005</b>            | <b>0.009</b>                            | <b>0.018</b>                            | <b>0.049</b>                            | <b>0.028</b>                            | <b>0.036</b>                            | <b>0.050</b>                            |
| <b>GSTP1 c.313 A&gt;G + GSTT1 null + GSTM1 null<sup>g</sup></b> |                         |                                         |                                         |                                         |                                         |                                         |                                         |
| 0 risk allele                                                   | 1.00 (reference)        |                                         | 1.00 (reference)                        | 1.00 (reference)                        | 1.00 (reference)                        | 1.00 (reference)                        |                                         |
| 1 risk allele                                                   | 0.97 (0.43-2.21)        |                                         | 1.04 (0.46-2.37)                        | 0.99 (0.42-2.32)                        | 0.74 (0.30-1.84)                        | 0.88 (0.37-2.12)                        |                                         |
| p-value (1 vs 0)                                                | 0.994                   | NA                                      | 0.929                                   | 0.974                                   | 0.512                                   | 0.782                                   | NA                                      |
| 2+ risk alleles                                                 | <b>2.82 (1.23-6.49)</b> |                                         | <b>3.04 (1.30-7.09)</b>                 | <b>2.66 (1.08-6.56)</b>                 | <b>3.06 (1.20-7.80)</b>                 | <b>2.94 (1.18-7.32)</b>                 |                                         |
| p-value (2+ vs 0)                                               | <b>0.015</b>            | NA                                      | <b>0.010</b>                            | <b>0.034</b>                            | <b>0.019</b>                            | <b>0.020</b>                            | NA                                      |

Statistical significant associations are bolded (p≤0.050).

<sup>a</sup> GSTP1 analysis adjusted for GSTT1 and GSTM1 genotypes

<sup>b</sup> adjusted for margin

<sup>c</sup> adjusted for margin, Gleason score (low-risk vs high-risk) and pathological T stage (pT2 vs pT3)

<sup>d</sup> adjusted for margin, Gleason score (low-risk vs high-risk), pathological T stage (pT2 vs pT3), PSA level at diagnosis (≤4 vs >4-10 vs >10), family history of PCa, smoking status (never vs former vs current) and age at diagnosis (continuous variable)

<sup>e</sup> adjusted for margin, Gleason score (low-risk vs high-risk), PSA level at diagnosis (≤4 vs >4-10 vs >10), family history of PCa, smoking status (never vs former vs current), and age at diagnosis (continuous variable).

<sup>f</sup> *GSTP1* analysis adjusted for *GSTT1* and *GSTM1* genotypes, margin, Gleason score (low-risk vs high-risk), PSA level at diagnosis ( $\leq 4$  vs  $>4-10$  vs  $>10$ ), family history of PCa, smoking status (never vs former vs current), and age at diagnosis (continuous variable).

<sup>g</sup> for *GSTP1* c.313 A>G the recessive model was considered

Abbreviations: NA; not applicable
